# Supplementary material
Source: publisher site journal article supplement (https://kjim.org/upload/media/kjim-2024-011-Supplementary-Table-2.pdf)
Supplement: Supplementary file 1 [file kjim-2024-011-Supplementary-Table-2.pdf]

**Supplementary Table 2. Itemized analysis of BD patients who did not ANCA but could be reclassified as having OS-BD-GPA according to the 2022 ACR/EULAR criteria for GPA**

| Patient's number | Scores based on the 2022 ACR/EULAR criteria for GPA | 1 (+3) | 2 (+2) | 3 (+1) | 4 (+5) | 5 (+2) | 6 (+2) | 7 (+1) | 8 (+1) | 9 (-1) | 10 (-4) |
|------------------|-----------------------------------------------------|--------|--------|--------|--------|--------|--------|--------|--------|--------|---------|
| 1                | 5                                                   | 0      | 0      | 1      | 0      | 1      | 1      | 0      | 0      | 0      | 0       |

1 = Nasal involvement (discharge, ulcers, crusting, congestion, septal defect/perforation); 2 = Cartilaginous involvement; 3 = Conductive or sensorineural hearing loss; 4 = PR3-ANCA (or C-ANCA) positivity; 5 = Pulmonary nodules, mass or cavitation; 6 = Granuloma, granulomatous inflammation, or giant cells on biopsy; 7 = Nasal/paranasal sinusitis or mastoiditis on imaging; 8 = Pauci-immune glomerulonephritis on biopsy; 9 = MPO-ANCA (or P-ANCA) positivity; 10 = Serum eosinophil count  $\geq 1,000/\mu\text{L}$

BD, Behçet's disease; ANCA, antineutrophil cytoplasmic antibody; OS, overlap syndrome; GPA, granulomatosis with polyangiitis; ACR, the American College of Rheumatology; EULAR, the European Alliance of Associations for Rheumatology; PR3, proteinase 3; C, cytoplasmic; MPO, myeloperoxidase; P, perinuclear.
